# Supplementary material
Source: HighWire-hosted journal article supplement (https://jitc.bmj.com/content/11/1/e006059)

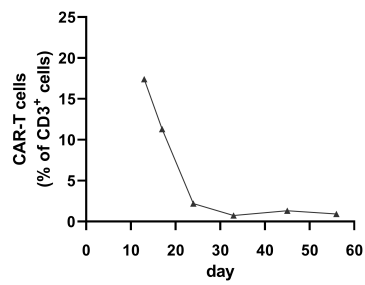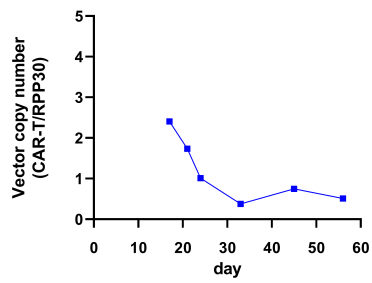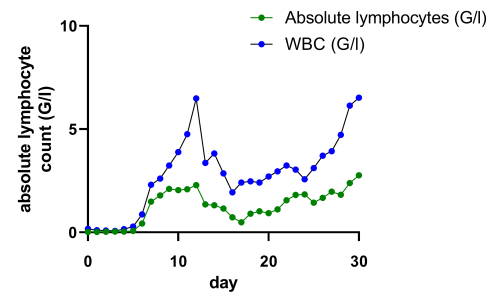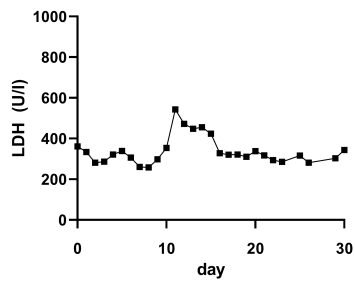

Supplement: inline-supplementary-material-2 [file inline-supplementary-material-2.pdf]
